---

## Corrections

*Structural insights into chondroitin sulfate binding in pregnancy-associated malaria*

By PONGSAK KHUNRAE and MATTHEW K. HIGGINS

Volume 38 Part 5 (2010) 1337–1341

In this paper, in the section “Does the VAR2CSA ectodomain adopt higher-order architecture?”, the final sentence of the third paragraph featured an incorrect citation. The sentence should read “Small-angle X-ray scattering also reveals a folded, monomeric structure significantly more compact than expected from a flexible linear chain of domains [46].”

*Nonsense-mediated mRNA decay and development: shoot the messenger to survive?*

By MARTA VICENTE-CRESPO and ISABEL M. PALACIOS

Volume 38 Part 6 (2010) 1500–1505

In this paper, an incorrect reference 43 was provided. The reference should be:

Riehs, N., Akimcheva, S., Puizina, J., Bulankova, P., Idol, R.A., Siroky, J., Schleiffer, A., Schweizer, D., Shippen, D.E. and Riha, K. (2008) *Arabidopsis* SMG7 protein is required for exit from meiosis. *J. Cell Sci.* **121**, 2208–2216
